# Supplementary material for: A fluorescent probe with serum albumin as a signal amplifier for real-time sensing of HSO 3 − in solution, mitochondria of animal cells and rice roots
Source: Royal Society of Chemistry journal article supplement (doi:10.1039/d4tb01275e), 2024-01-01
Supplement: d4tb01275e1.pdf [file d4tb01275e1.pdf]

### Supporting information

## Fluorescent probe with serum albumin as a signal amplifier for real-time sensing of $\text{HSO}_3^-$ in solution, mitochondria of animal cells and rice roots

Manzoor Ahmad<sup>a,b,\*</sup>, Shagun Verma<sup>c</sup>, Nancy Singla<sup>a</sup>, Siloni Singh Bhadwal<sup>c</sup>, Satwinderjeet Kaur<sup>c\*</sup>, Prabhpreet Singh<sup>a</sup>, Subodh Kumar<sup>a</sup>

- Department of Chemistry, Centre for Advanced Studies, Guru Nanak Dev University, Amritsar, Punjab, India
- Chemistry & Physics of Materials Unit, Jawaharlal Nehru Centre for Advanced Scientific Research (JNCASR), Jakkur P.O., Bangalore 560064, India
- Department of Botanical and Environment Sciences, Centre for Advanced Studies, Guru Nanak Dev University, Amritsar, Punjab, India

|                                                                                                                                                                                                                                                                                                                                                                                   |        |
|-----------------------------------------------------------------------------------------------------------------------------------------------------------------------------------------------------------------------------------------------------------------------------------------------------------------------------------------------------------------------------------|--------|
| Figure S1: $^1\text{H}$ NMR spectrum of compound 1                                                                                                                                                                                                                                                                                                                                | Page 3 |
| Figure S2: $^{13}\text{C}$ NMR spectrum of compound 1                                                                                                                                                                                                                                                                                                                             | Page 3 |
| Figure S3: $^1\text{H}$ NMR spectrum of probe MGQ                                                                                                                                                                                                                                                                                                                                 | Page 4 |
| Figure S4: $^{13}\text{C}$ NMR spectrum of probe MGQ                                                                                                                                                                                                                                                                                                                              | Page 4 |
| Figure S5: HRMS of probe MGQ                                                                                                                                                                                                                                                                                                                                                      | Page 5 |
| Figure S6. (A) UV-Vis spectra of MGQ (10 $\mu\text{M}$ ) in DMSO-water (PBS buffer, pH 7.4) binary mixtures; $\lambda_{\text{ex}}$ 400 nm.                                                                                                                                                                                                                                        | Page 5 |
| Figure S7. (A) Fluorescence spectra of MGQ (10 $\mu\text{M}$ ) in DMSO-water (PBS buffer, pH 7.4) binary mixtures; $\lambda_{\text{ex}}$ 400 nm; (B) The plot of fluorescence intensity of MGQ (10 $\mu\text{M}$ ) at 680 nm and 510 nm versus the fraction of water in DMSO; (C) The plot of fluorescence intensity at 680 nm against [MGQ] in PBS buffer, pH 7.4 (< 0.1% DMSO). | Page 6 |
| Figure S8. Species distribution in titration of MGQ with BSA                                                                                                                                                                                                                                                                                                                      | Page 6 |
| Figure S9. (A) Time dependent fluorescence spectra of MGQ (4 $\mu\text{M}$ , 1:1 EtOH PBS-buffer pH 7.4) with $\text{HSO}_3^-$ (40 $\mu\text{M}$ ); (B) The plot of fluorescence intensity of MGQ (4 $\mu\text{M}$ ) at 670 nm vs Time in 1:1 EtOH PBS-buffer                                                                                                                     | Page 7 |
| Figure S10. (A) Time dependent UV-Vis spectra of MGQ (4 $\mu\text{M}$ , 1:1 EtOH PBS-buffer pH 7.4) with $\text{HSO}_3^-$ (40 $\mu\text{M}$ ); (B) The plot of absorbance intensity of MGQ (4 $\mu\text{M}$ , 1:1 EtOH PBS-buffer pH 7.4) at 380 nm and 525 nm vs time with $\text{HSO}_3^-$ (40 $\mu\text{M}$ )                                                                  | Page 7 |
| Figure S11. (A) Fluorescence spectra of MGQ in 1:1 EtOH PBS with different concentrations of $\text{HSO}_3^-$                                                                                                                                                                                                                                                                     | Page 8 |
| Figure S12. (A) Time dependent Fluorescence spectra of with $\text{HSO}_3^-$                                                                                                                                                                                                                                                                                                      | Page 8 |
| Figure S13. (A) DLS spectra of MGQ in water and in water + BSA                                                                                                                                                                                                                                                                                                                    | Page 9 |
| Figure S14 Images of HeLa cells MGQ and Lyso-tracker red and ER tracker red.                                                                                                                                                                                                                                                                                                      | Page 9 |

| S.No. | Reference                                  | Solvent System                        | LOD for SA's | Response time for SA's | LOD for HSO <sub>3</sub> <sup>-</sup> | Response time for HSO <sub>3</sub> <sup>-</sup> | Imaging Animal cells | Imaging Plant cells |
|-------|--------------------------------------------|---------------------------------------|--------------|------------------------|---------------------------------------|-------------------------------------------------|----------------------|---------------------|
| 1     | Dyes and Pigments 2024, 222, 111901        | DMF/Tris (v:v = 2:8, pH = 7.3         | NA           | NA                     | 0.19 $\mu$ M                          | 1 min                                           | MCF-7                | NA                  |
| 2     | Analytica Chimica Acta 1305 (2024) 342588  | PBS, 30 % DMSO, pH = 7.4              | NA           | NA                     | 1.87 $\mu$ M                          | 60 min                                          | HeLa                 | NA                  |
| 3     | Methods 225 (2024) 100–105                 | PBS pH 7.4                            | NA           | NA                     | 148.9 nM                              | 60 min                                          | CT-26                | NA                  |
| 4     | J. Org. Chem. 2023, 88, 9959–9967          | DMSO/PBS (V/V = 1/99, pH = 7.2        | NA           | NA                     | 0.823 $\mu$ M                         | 6 min                                           | HeLa                 | NA                  |
| 5     | Chem. Commun., 2021, 57, 655--658          | EtOH:PBS(5:95) pH 7.4                 | NA           | NA                     | 67 nM                                 | 10 s                                            | HeLa                 | NA                  |
| 6     | Anal. Chem. 2019, 91, 11946–11951          | PBS, 5% DMSO, pH = 5.5                | NA           | NA                     | 20.7nM                                | 200 s                                           | HeLa                 | NA                  |
| 7     | ACS Omega 2018, 3, 11831–11837             | PBS, 1% DMSO, pH 7.4                  | NA           | NA                     | 0.1 $\mu$ M                           | 5 min                                           | HepG2                | NA                  |
| 8     | Sens. Actuators, B, 2017, 243, 51–58.      | PBS/DMF = 9 : 1, pH 7.4               | NA           | NA                     | 87 nM                                 | NA                                              | HeLa                 | NA                  |
| 9     | J. Mater. Chem. B, 2017, 5, 3862-3869      | PBS buffer of pH 7.4.                 | NA           | NA                     | 22 nM                                 | 1 min                                           | HepG2                | NA                  |
| 10    | ACS Omega 2023, 8, 2639–2647               | 99.9% PBS 50 $\mu$ M HSA              | 4 to 45nM    | 20 to 90 min.          | 10 nM                                 | 30 s                                            | MCF-7                | NA                  |
| 11    | Anal. Chem. 2020, 92, 16130–16137          | PBS, 0.3 $\mu$ M HSA, pH 7.4          | 0.228 nM     | 3 min                  | 1.4 $\mu$ M                           | 5 min                                           | HeLa                 | NA                  |
| 12    | Sensors and Actuators B 267 (2018) 104–110 | PBS, 1% DMSO, HSA (5 $\mu$ M), pH 7.4 | NA           | NA                     | 99 nM                                 | 10 min                                          | MCF-7                | NA                  |
| 13    | Current work                               | PBS buffer, pH 7.4, BSA(80 $\mu$ M)   | 10 nM        | $\leq$ 1 min           | 4 nM                                  | 1.5 min                                         | HeLA                 | Roots               |

Table S.I : Comparison of probe MGQ with recently published probes for the detection of HSO<sub>3</sub><sup>-</sup>

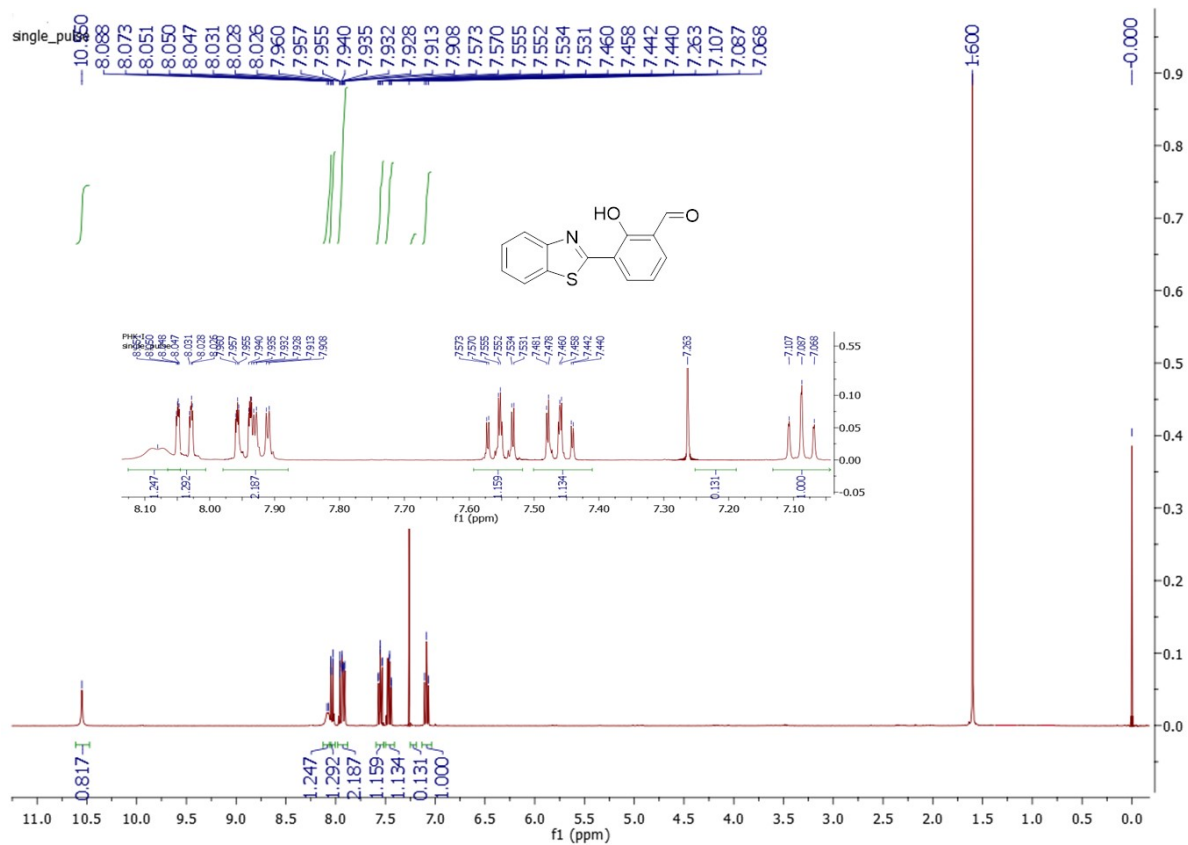

Figure S1: <sup>1</sup>H NMR spectrum of compound 1

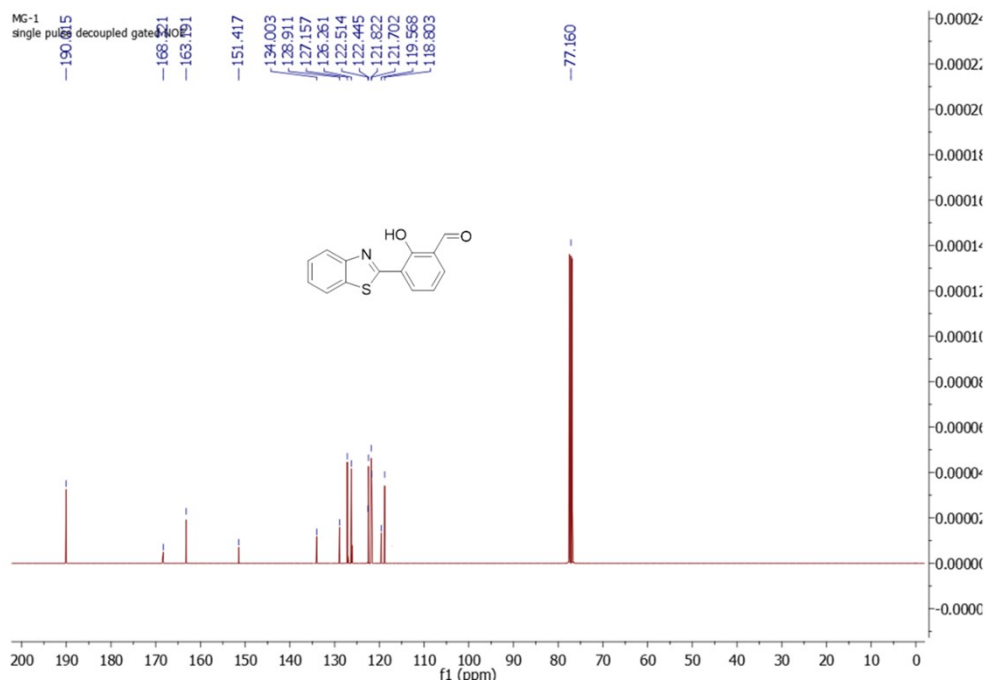

Figure S2: <sup>13</sup>C NMR spectrum of compound 1

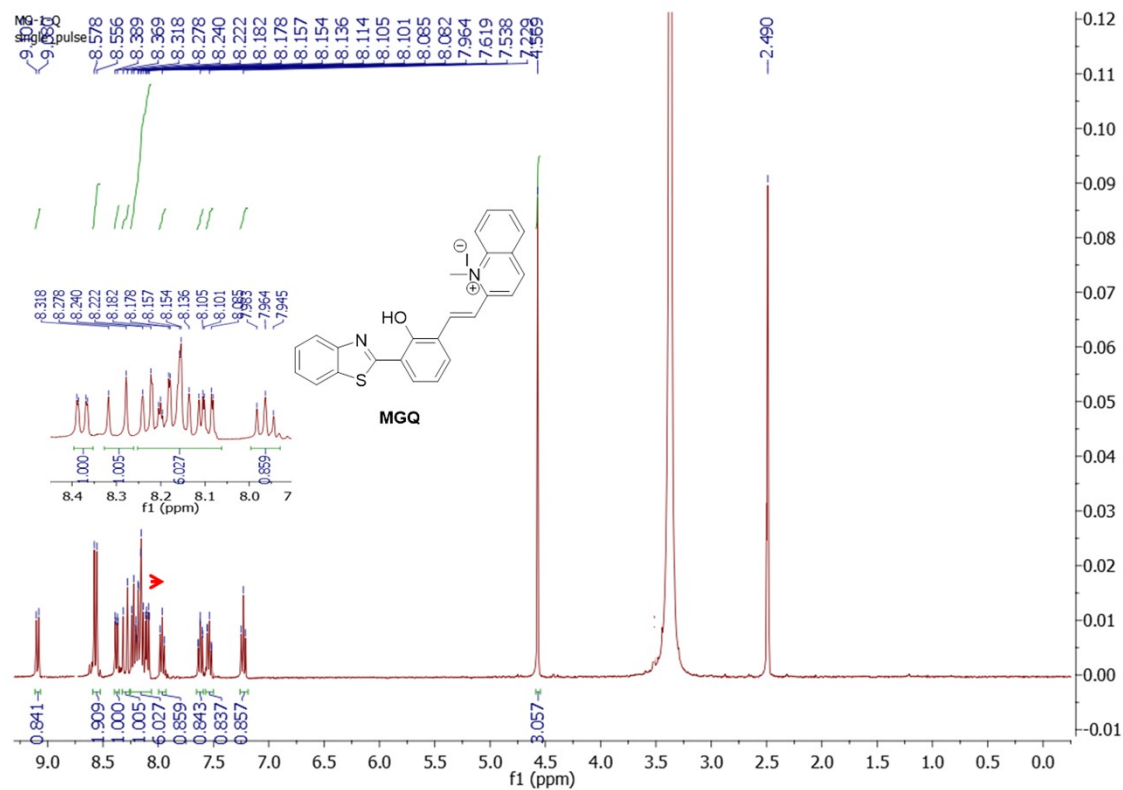

Figure S3: <sup>1</sup>H NMR spectrum of probe MGQ

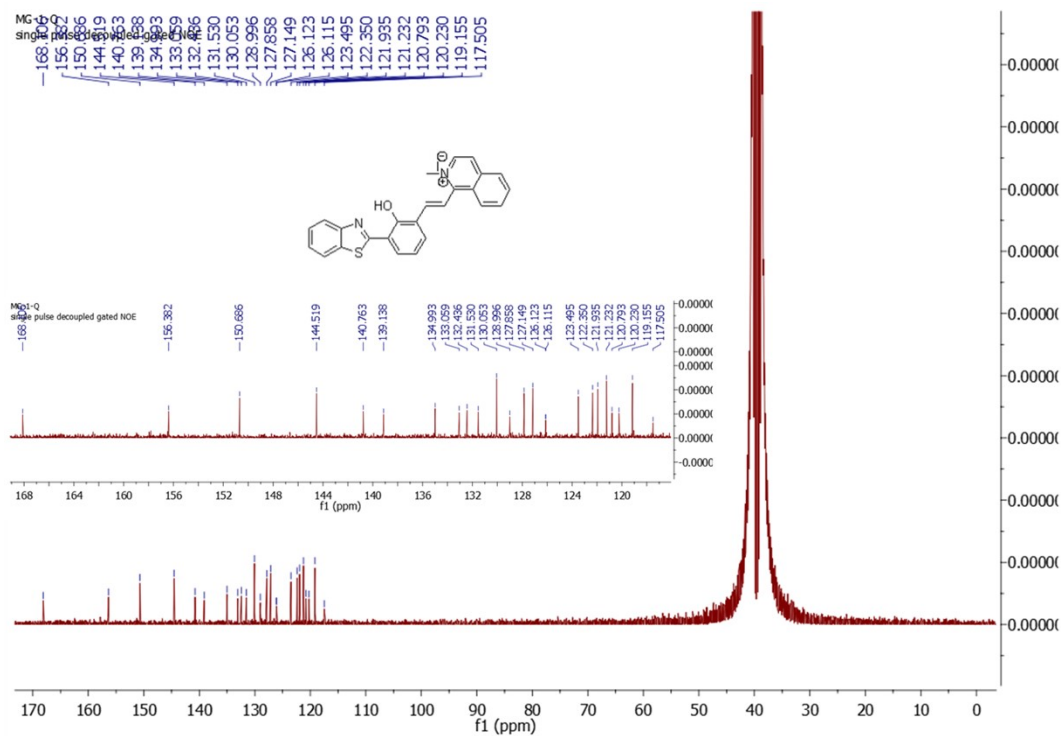

Figure S4: <sup>13</sup>C NMR spectrum of probe MGQ

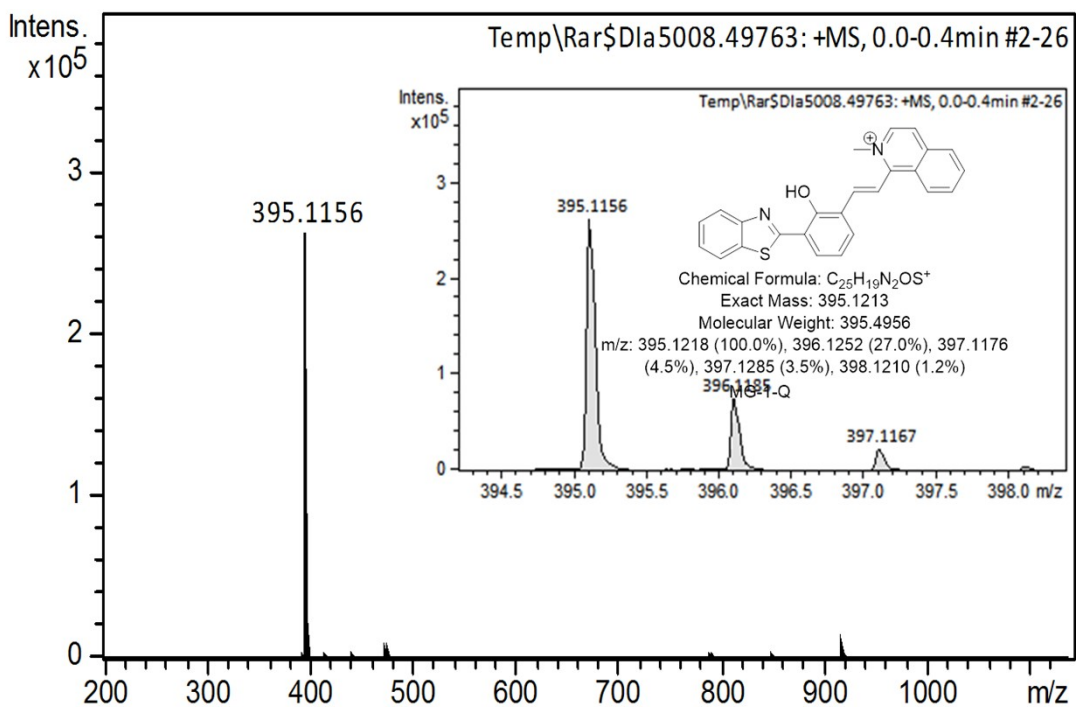

Figure S5: HRMS of probe MGQ

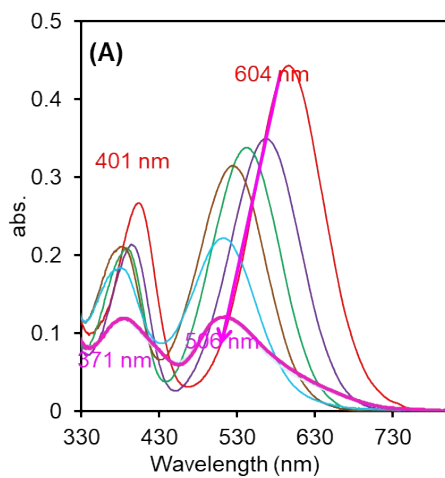

Figure S6. UV-Vis spectra of MGQ (10  $\mu$ M) in DMSO-water (PBS buffer, pH 7.4) binary mixtures;  $\lambda_{ex}$  400 nm.

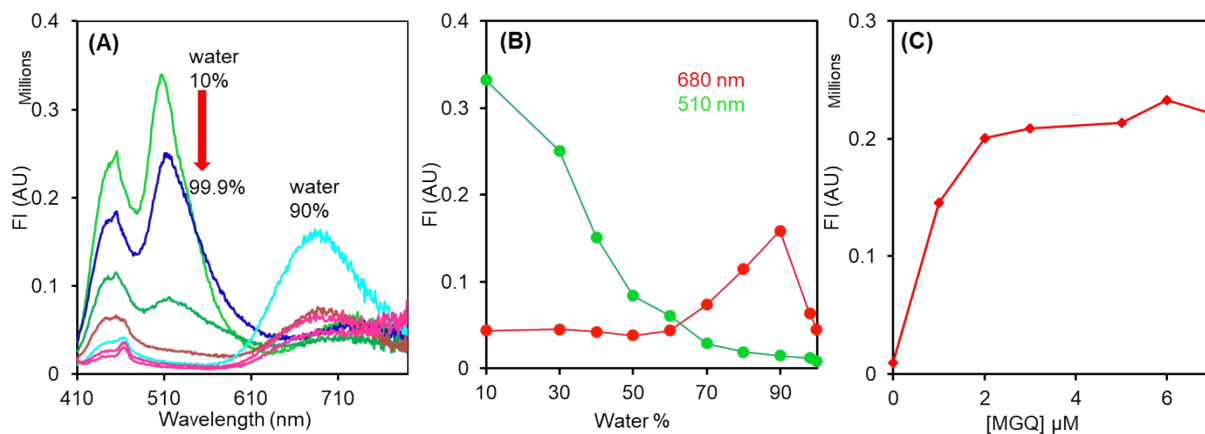

Figure S7. (A) Fluorescence spectra of MGQ (10 μM) in DMSO-water (PBS buffer, pH 7.4) binary mixtures;  $\lambda_{\text{ex}}$  400 nm; (B) The plot of fluorescence intensity of MGQ (10 μM) at 680 nm and 510 nm versus the fraction of water in DMSO; (C) The plot of fluorescence intensity at 680 nm against [MGQ] in PBS buffer, pH 7.4 (< 0.1% DMSO).

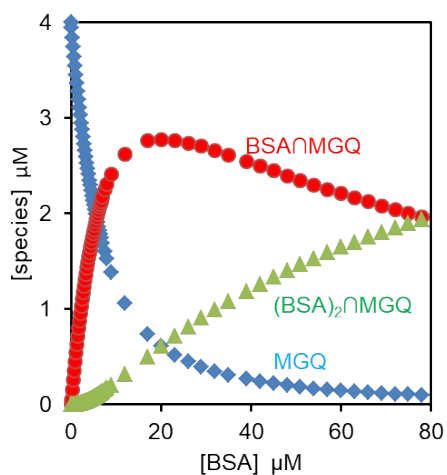

Figure S8. Species distribution in titration of MGQ with BSA

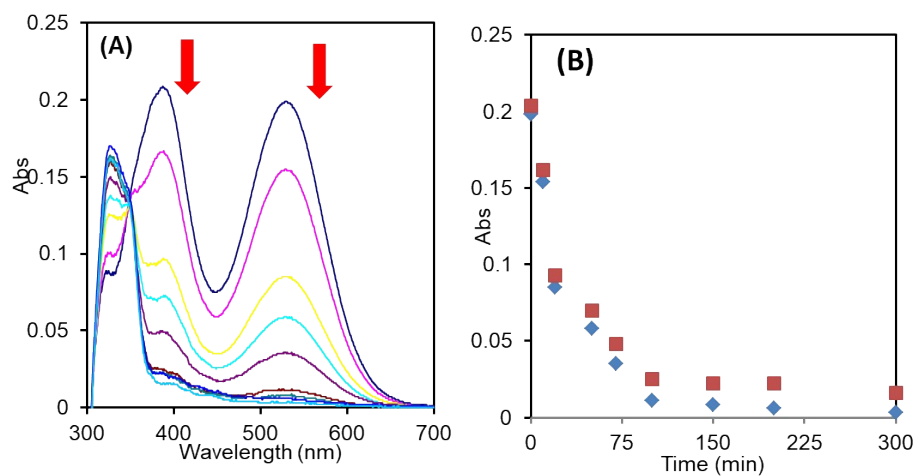

Figure S9. (A) Time dependent UV-Vis spectra of MGQ (4  $\mu\text{M}$ , 1:1 EtOH PBS-buffer pH 7.4) with  $\text{HSO}_3^-$  (40  $\mu\text{M}$ ); (B) The plot of absorbance intensity of MGQ (4  $\mu\text{M}$ , 1:1 EtOH PBS-buffer pH 7.4) at 380 nm and 525 nm vs time with  $\text{HSO}_3^-$  (40  $\mu\text{M}$ )

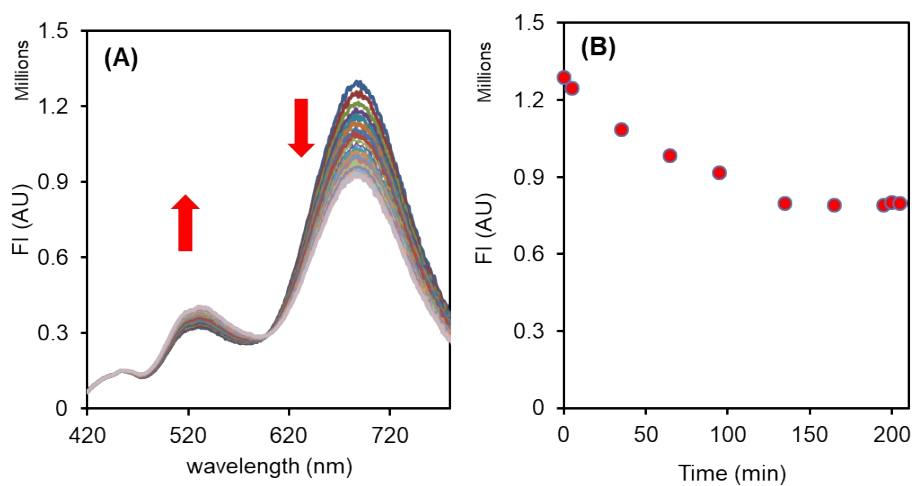

Figure S10. (A) Time dependent fluorescence spectra of MGQ (4  $\mu\text{M}$ , 1:1 EtOH PBS-buffer pH 7.4) with  $\text{HSO}_3^-$  (40  $\mu\text{M}$ ); (B) The plot of fluorescence intensity of MGQ (4  $\mu\text{M}$ ) at 670 nm vs Time in 1:1 EtOH PBS-buffer

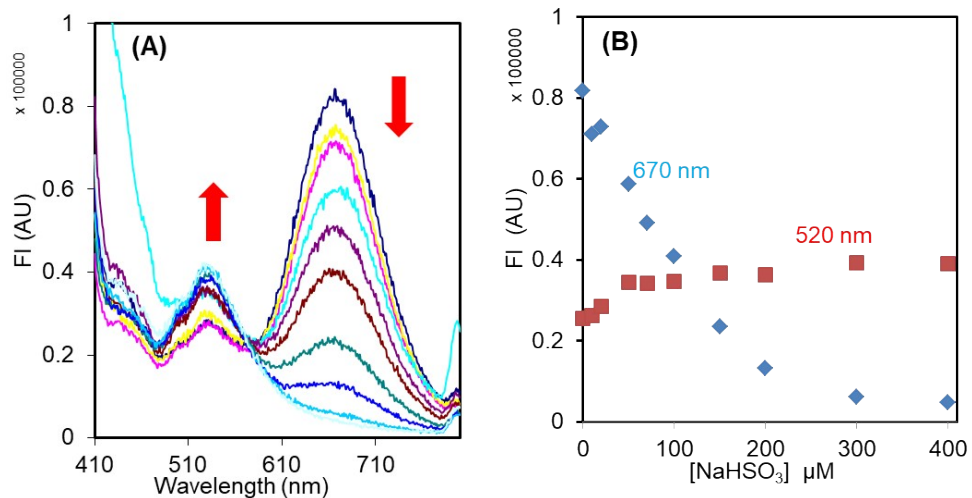

Figure S11. (A) Fluorescence spectra of MGQ (4  $\mu\text{M}$ , 1:1 EtOH PBS-buffer pH 7.4) with different concentrations of  $\text{HSO}_3^-$ ; (B) Plot of fluorescence intensity at 520 nm and 670 nm vs  $[\text{HSO}_3^-]$

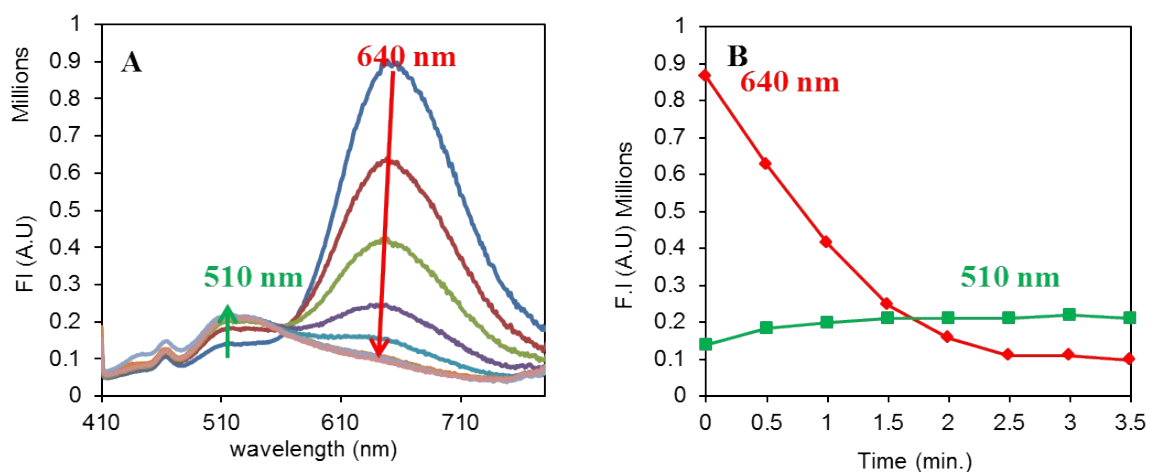

Figure S12. (A) Time dependent Fluorescence spectra of MGQ (4  $\mu\text{M}$ , BSA (80  $\mu\text{M}$ ) buffer pH 7.4) with  $\text{HSO}_3^-$  (50  $\mu\text{M}$ ); (B) Time dependent plot of fluorescence intensity at 510 nm and 640 nm vs time (min.)



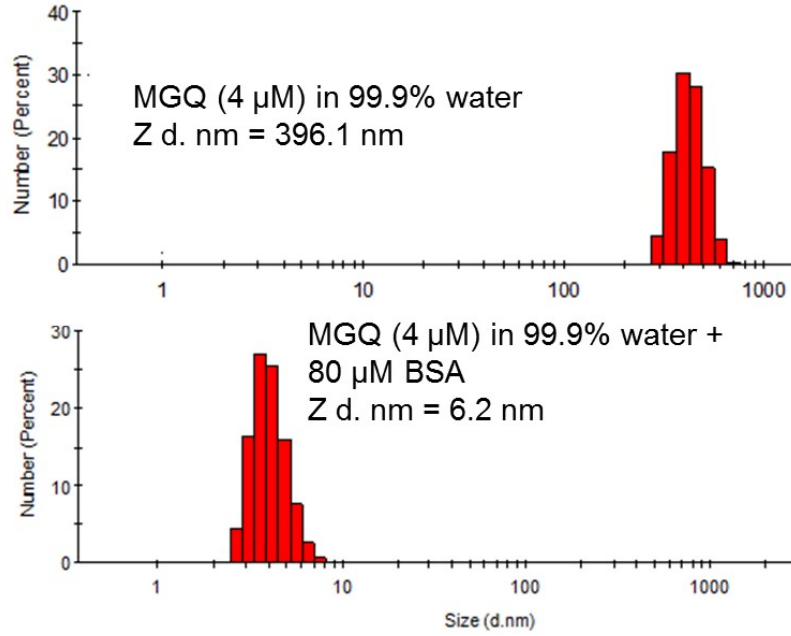

Figure S13. (A) DLS spectra of MGQ (4  $\mu\text{M}$ ) in 99.9% (B) DLS spectra of MGQ (4  $\mu\text{M}$ ) in 99.9% containing 80  $\mu\text{M}$  of BSA.

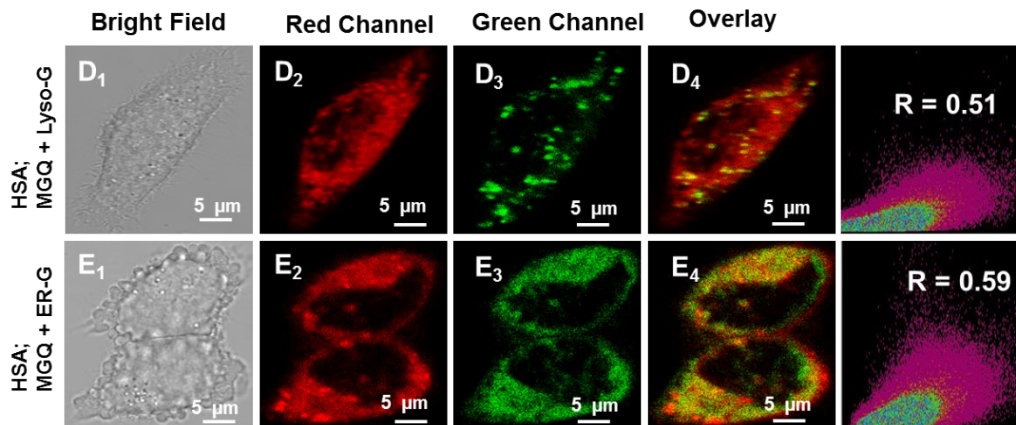

Figure S14 Images of HeLa cells on incubation with, (D<sub>1</sub> to D<sub>4</sub>) HSA (50  $\mu\text{M}$ ) for 3 h and then with MGQ (10  $\mu\text{M}$ ) and Lyso-tracker green (500 nM) for 1 h; (E<sub>1</sub> to E<sub>4</sub>) HSA (50  $\mu\text{M}$ ) for 3 h and then with MGQ (10  $\mu\text{M}$ ), ER tracker green (500 nM) for 1h. LASER 405 nm, 488 nm

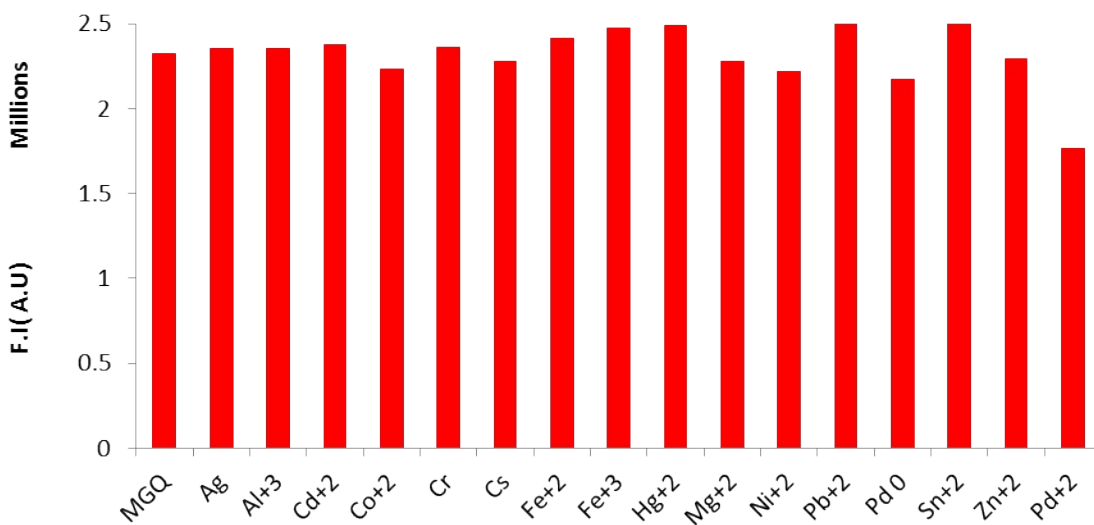

Figure S 15: The fluorescence intensity of **MGQ** (4 $\mu$ M) + BSA (80  $\mu$ M) in PBS buffer in the presence of different metal cations ; Ag<sup>+</sup>, Al<sup>3+</sup>, Cd<sup>2+</sup>, Co<sup>2+</sup> Cr<sup>3+</sup>, Cs<sup>+</sup>, Fe<sup>2+</sup>, Fe<sup>3+</sup>, Hg<sup>2+</sup>, Mg<sup>2+</sup> , Ni<sup>2+</sup>, Pb<sup>2+</sup>, Pd<sup>0</sup>, Sn<sup>2+</sup>, Zn<sup>2+</sup> and Pd<sup>2+</sup> (each 40  $\mu$ M)
